# Supplementary material for: Synthesis, Anticancer Activity and Molecular Docking Studies of Novel N-Mannich Bases of 1,3,4-Oxadiazole Based on 4,6-Dimethylpyridine Scaffold
Source: MDPI journal article supplement (doi:10.3390/ijms231911173), 2022-09-22

# SUPPLEMENTARY MATERIALS

## Synthesis, Anticancer Activity and Molecular Docking Studies of Novel N-Mannich Bases of 1,3,4-Oxadiazole Based on 4,6-Dimethylpyridine Scaffold

Małgorzata Strzelecka <sup>1</sup>, Teresa Glomb <sup>1,\*</sup>, Małgorzata Drag-Zalesińska <sup>2</sup>, Julita Kulbacka <sup>3</sup>, Anna Szewczyk <sup>3,4</sup>, Jolanta Saczko <sup>3</sup>, Paulina Kasperkiewicz-Wasilewska <sup>5</sup>, Nina Rembiałkowska <sup>3</sup>, Kamil Wojtkowiak <sup>6</sup>, Aneta Jezierska <sup>6</sup> and Piotr Świątek <sup>1,\*</sup>

<sup>1</sup> Department of Medicinal Chemistry, Faculty of Pharmacy, Wrocław Medical University, Borowska 211, 50-556 Wrocław, Poland

<sup>2</sup> Division of Histology and Embryology, Department of Human Morphology and Embryology, Faculty of Medicine, Wrocław Medical University, Chłubińskiego 6a, 50-368 Wrocław, Poland

<sup>3</sup> Department of Molecular and Cellular Biology, Faculty of Pharmacy, Wrocław Medical University, Borowska 211, 50-556 Wrocław, Poland

<sup>4</sup> Department of Animal Developmental Biology, Institute of Experimental Biology, University of Wrocław, Sienkiewicza 21, 50-335 Wrocław, Poland

<sup>5</sup> Department of Bioorganic Chemistry, Faculty of Chemistry, Wrocław University of Science and Technology, Wybrzeże Wyspiańskiego 27, 50-370 Wrocław, Poland

<sup>6</sup> Faculty of Chemistry, University of Wrocław, F. Joliot-Curie 14, 50-383 Wrocław, Poland

\* Correspondence: piotr.swiatek@umw.edu.pl (P.Ś.); teresa.glomb@umw.edu.pl (T.G.); Tel.: +48-717840391

**Table S1.** NMR spectra of new compounds

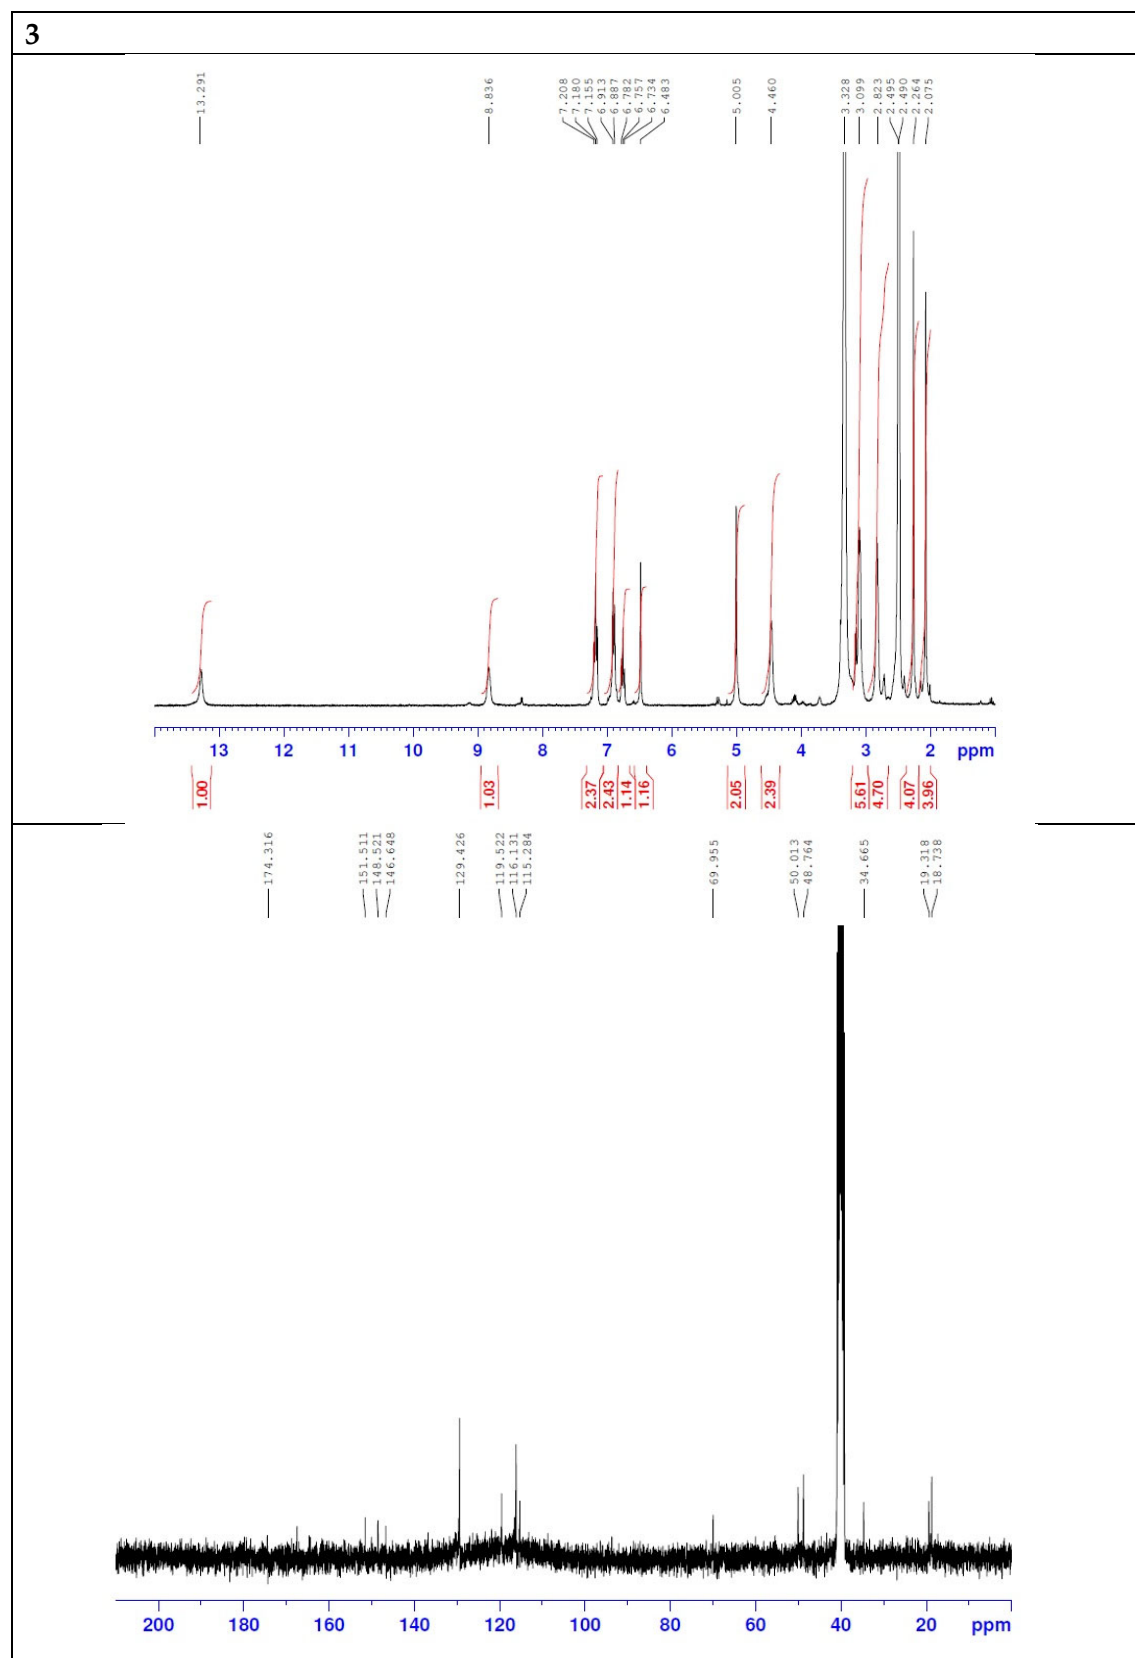

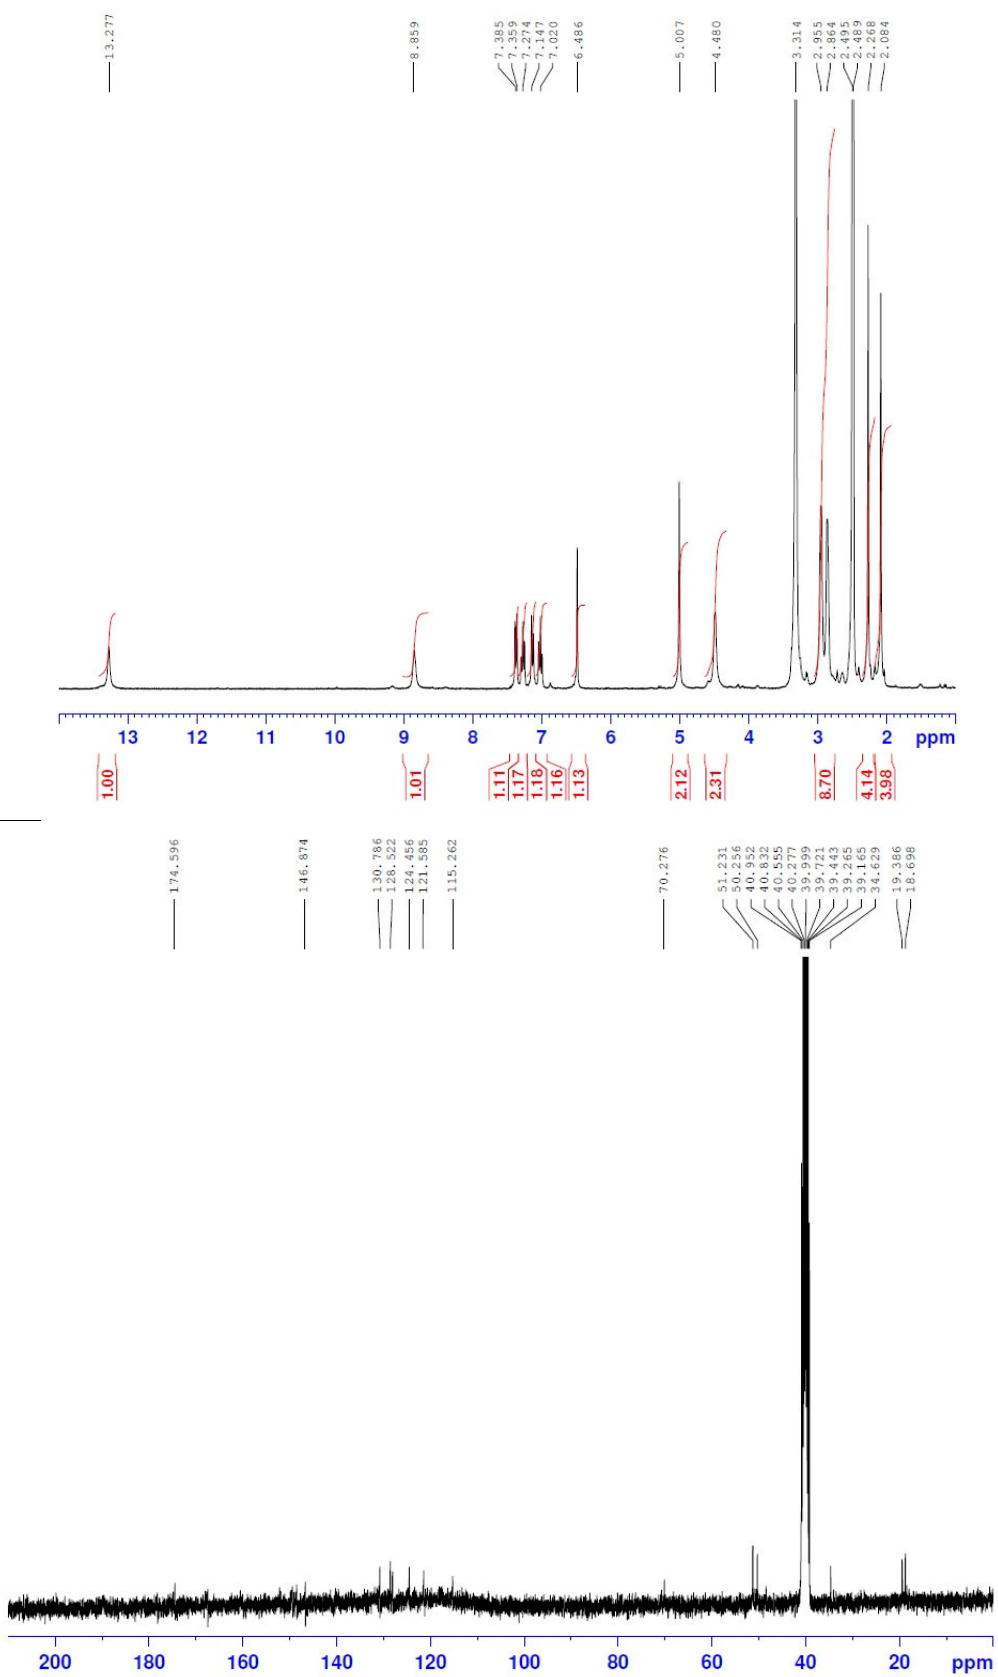

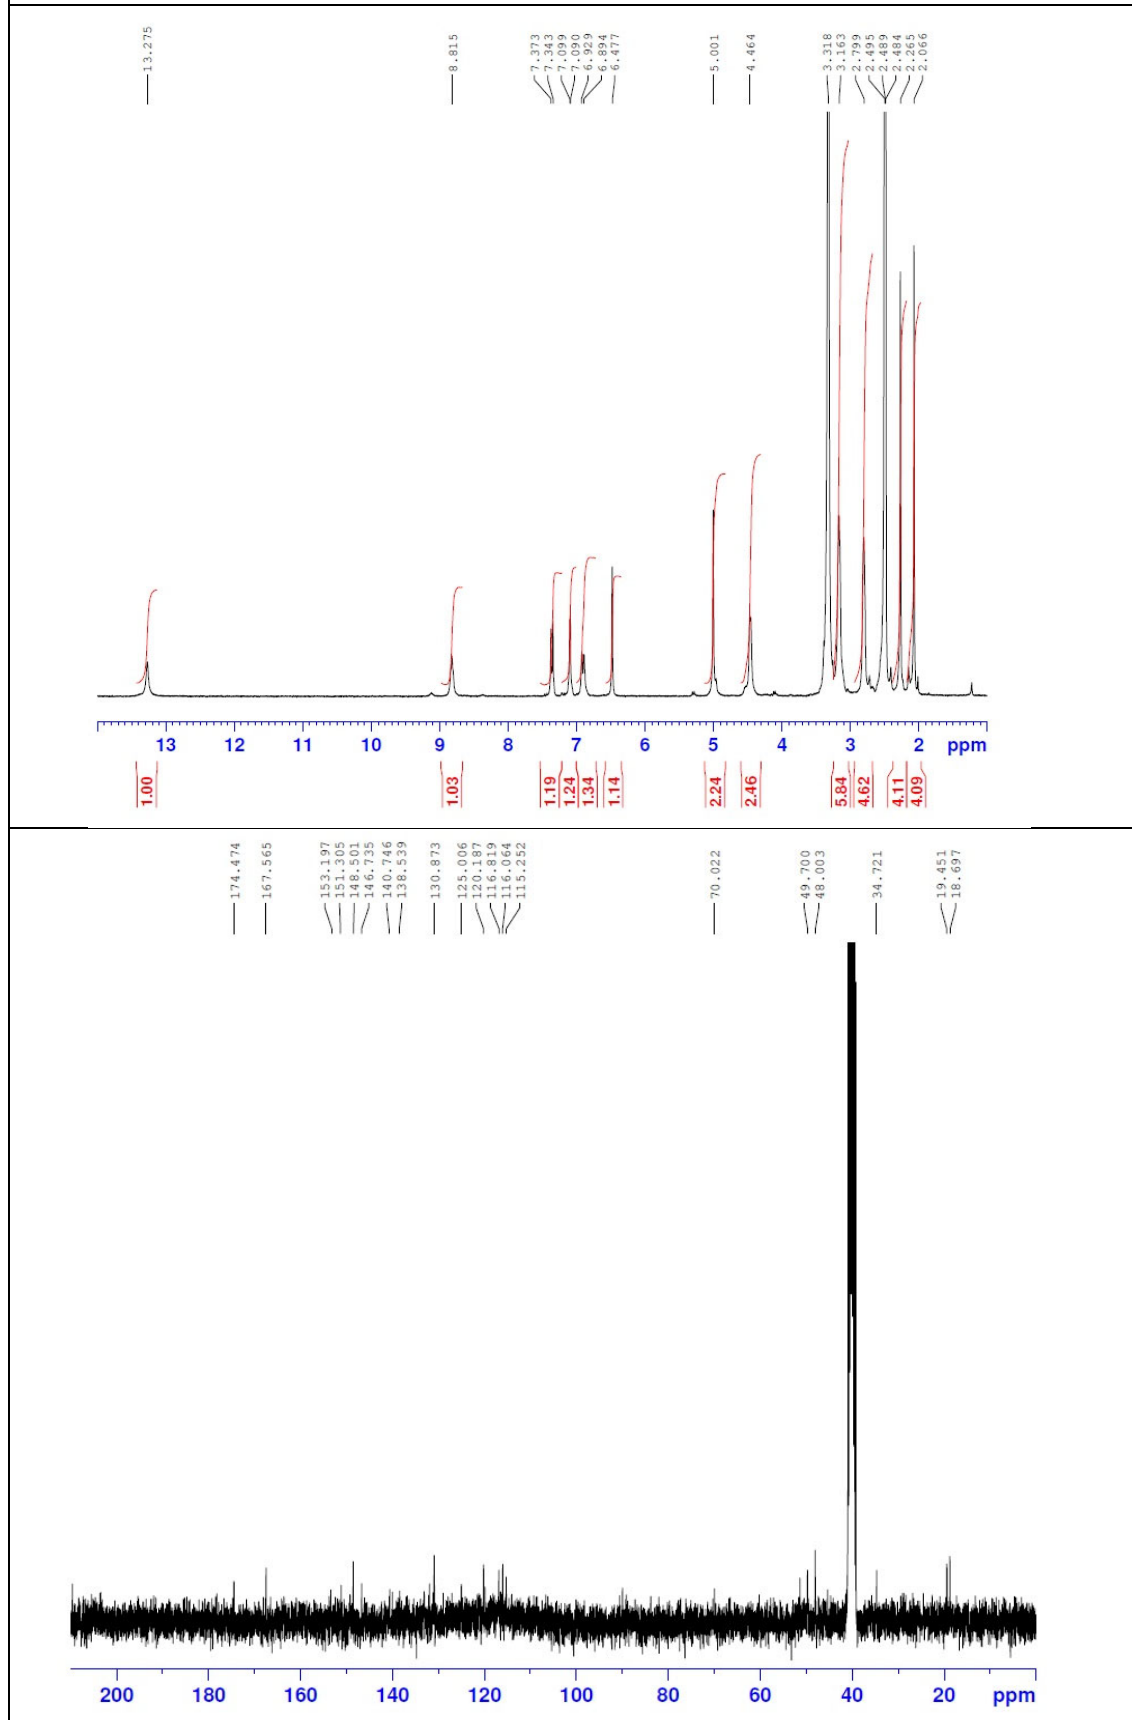

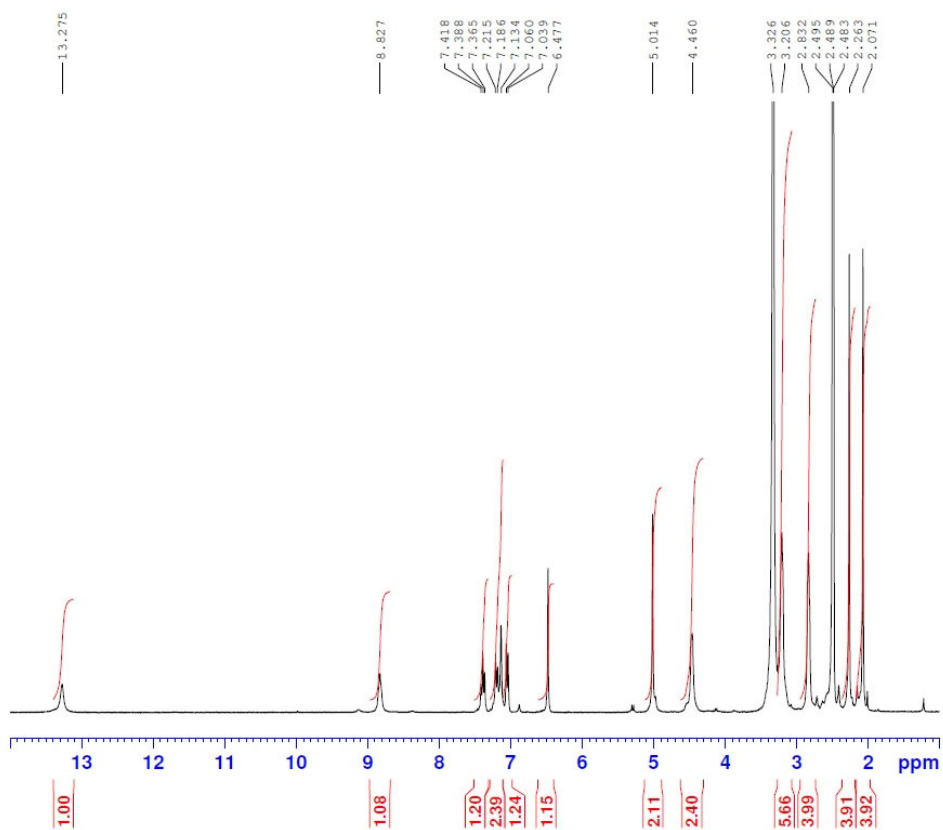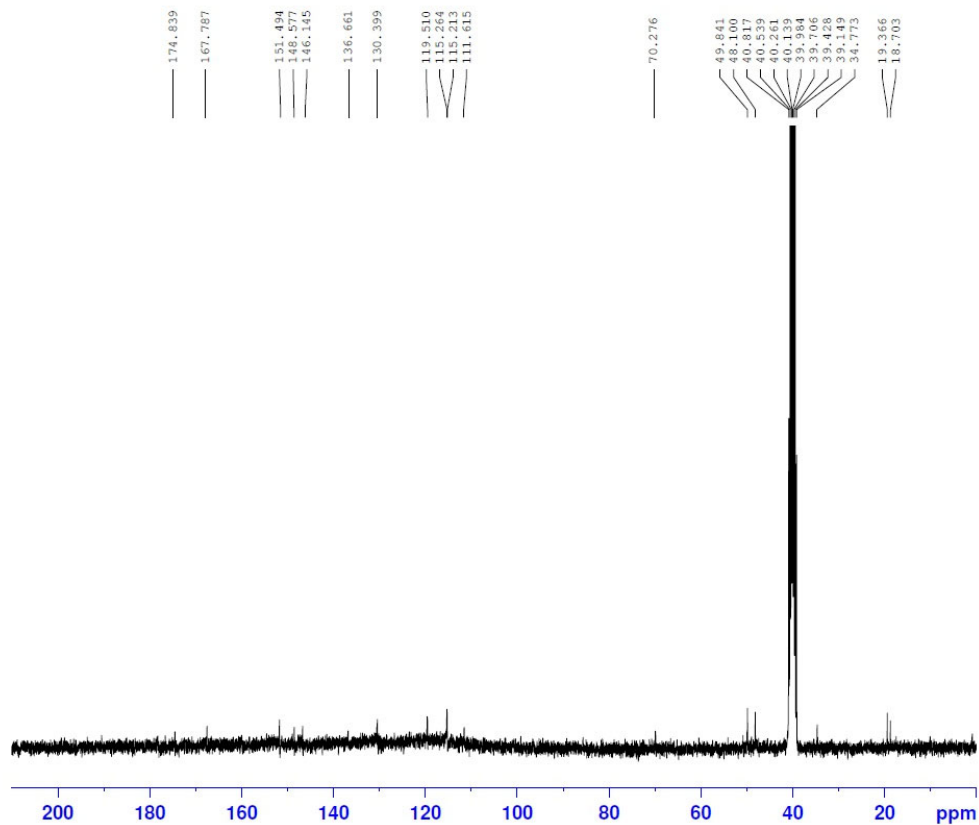

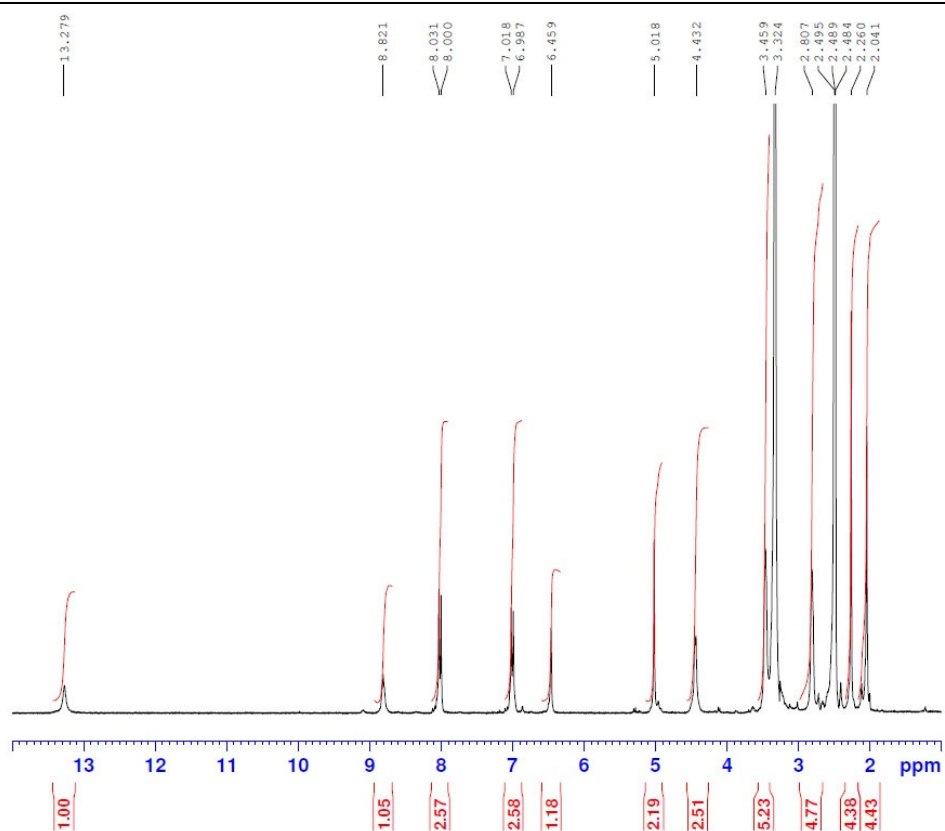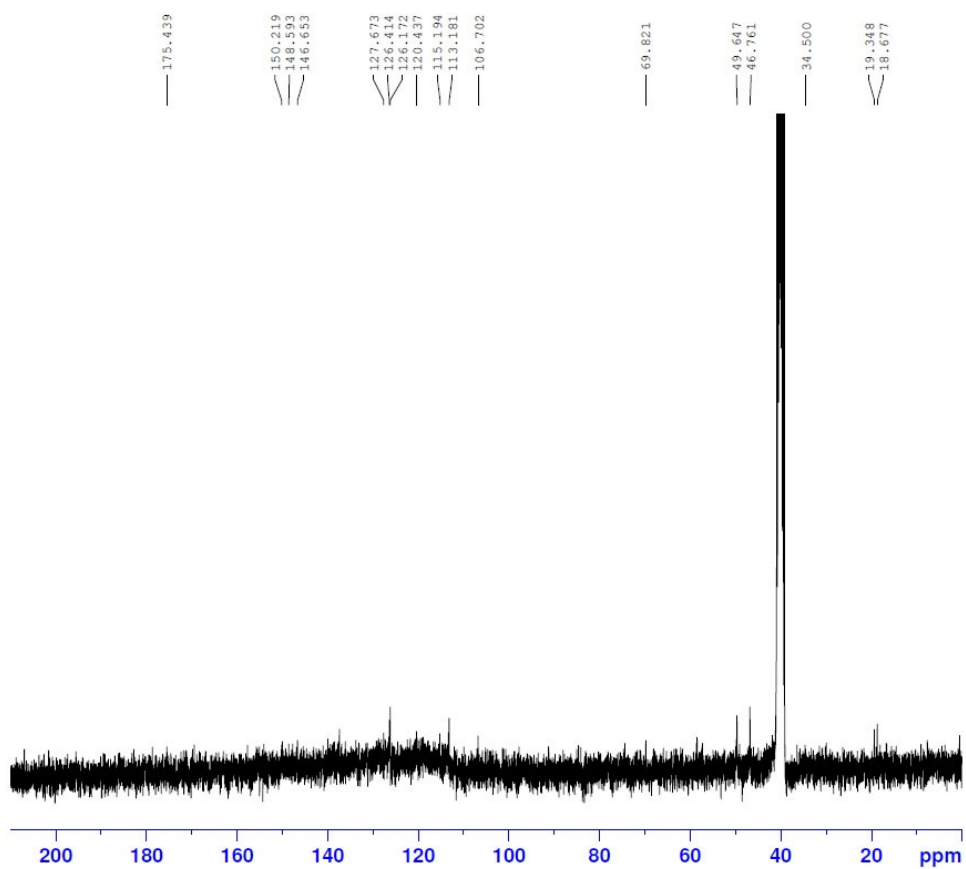

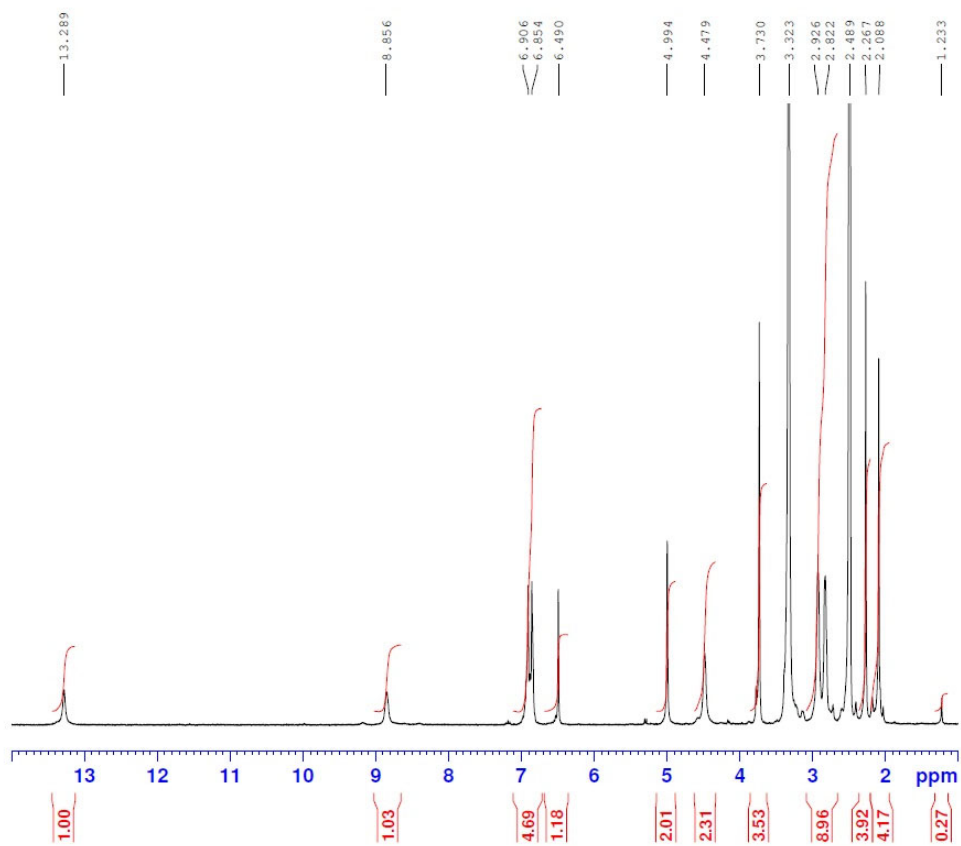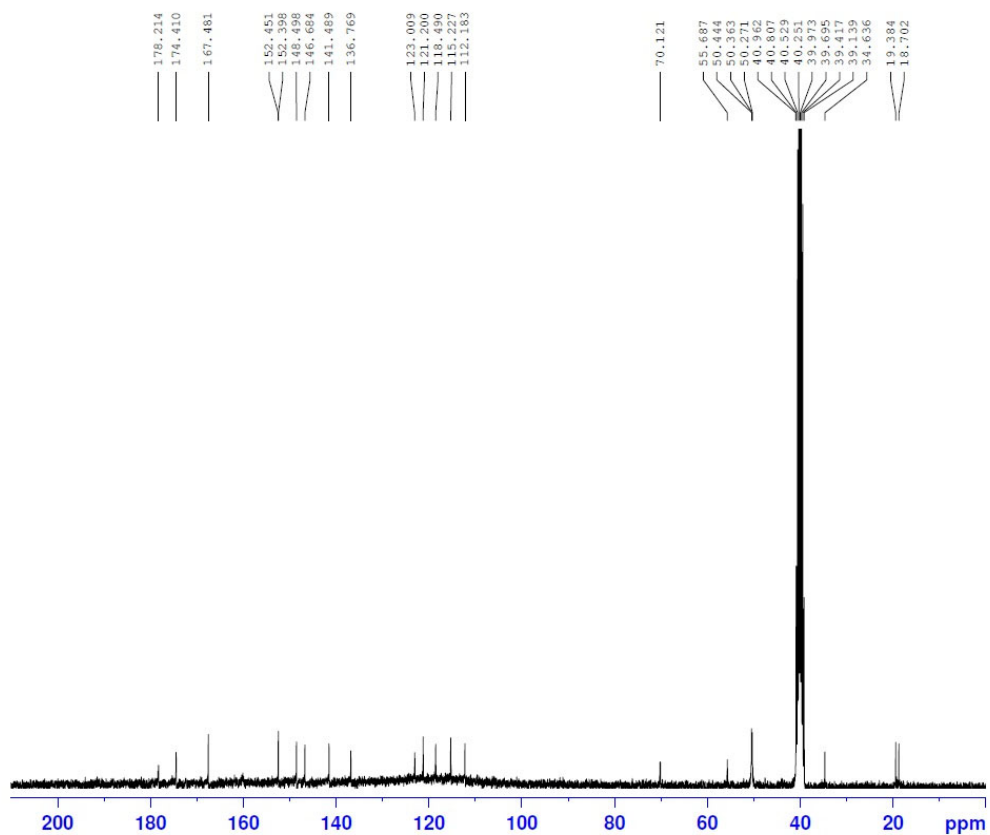

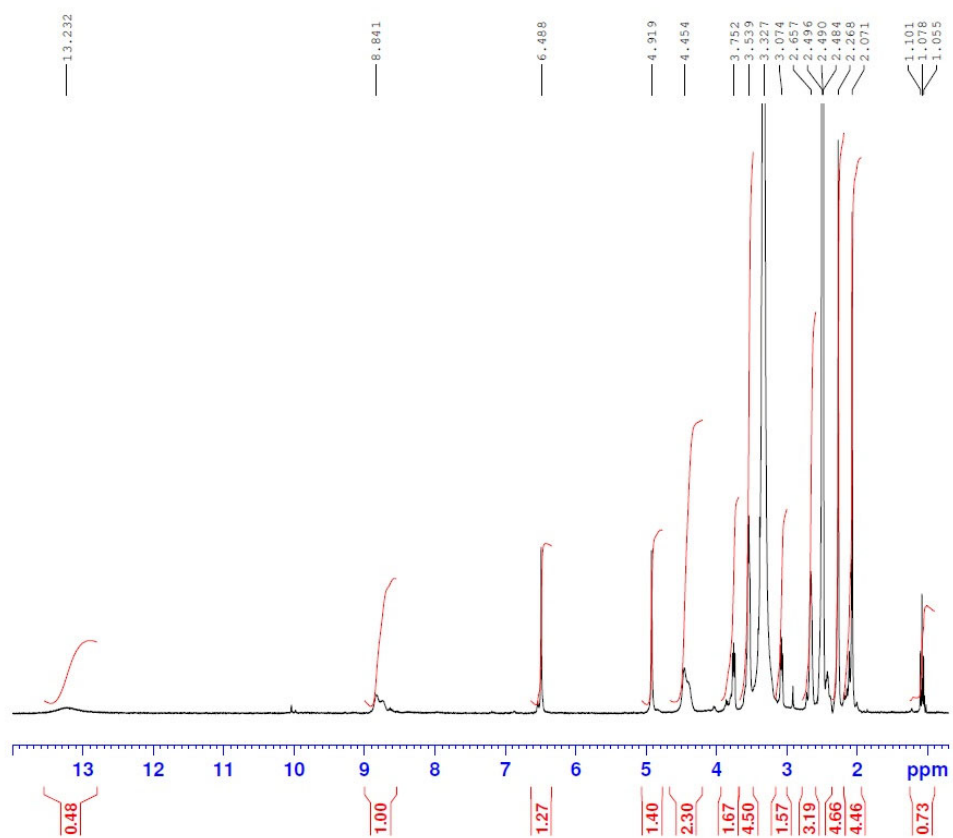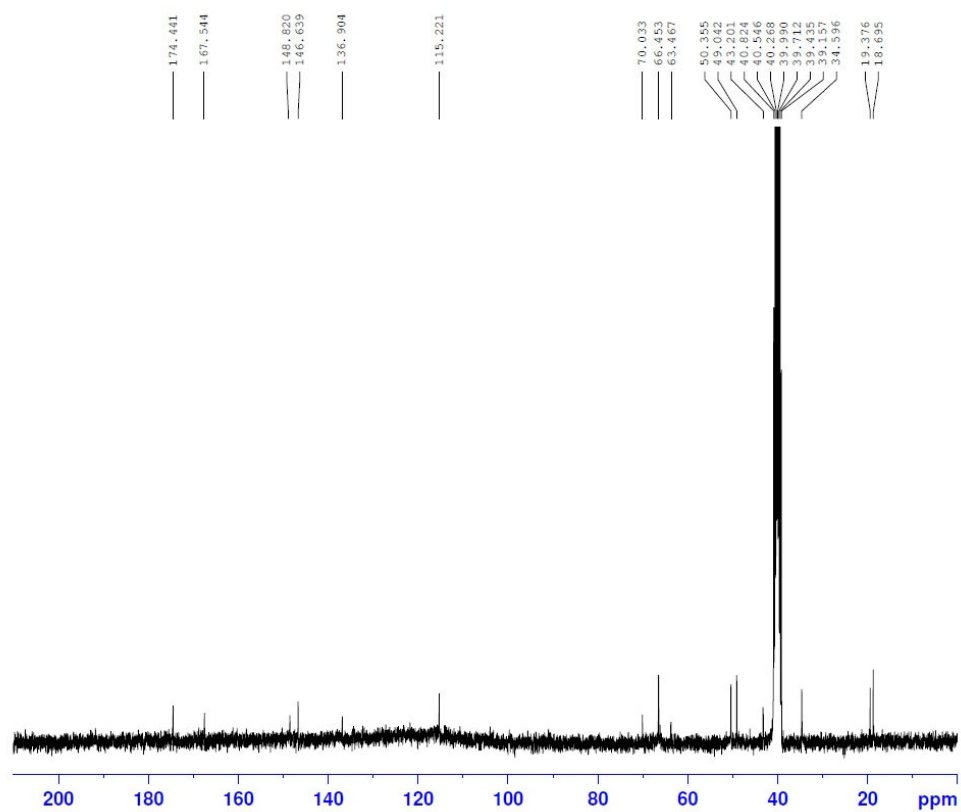



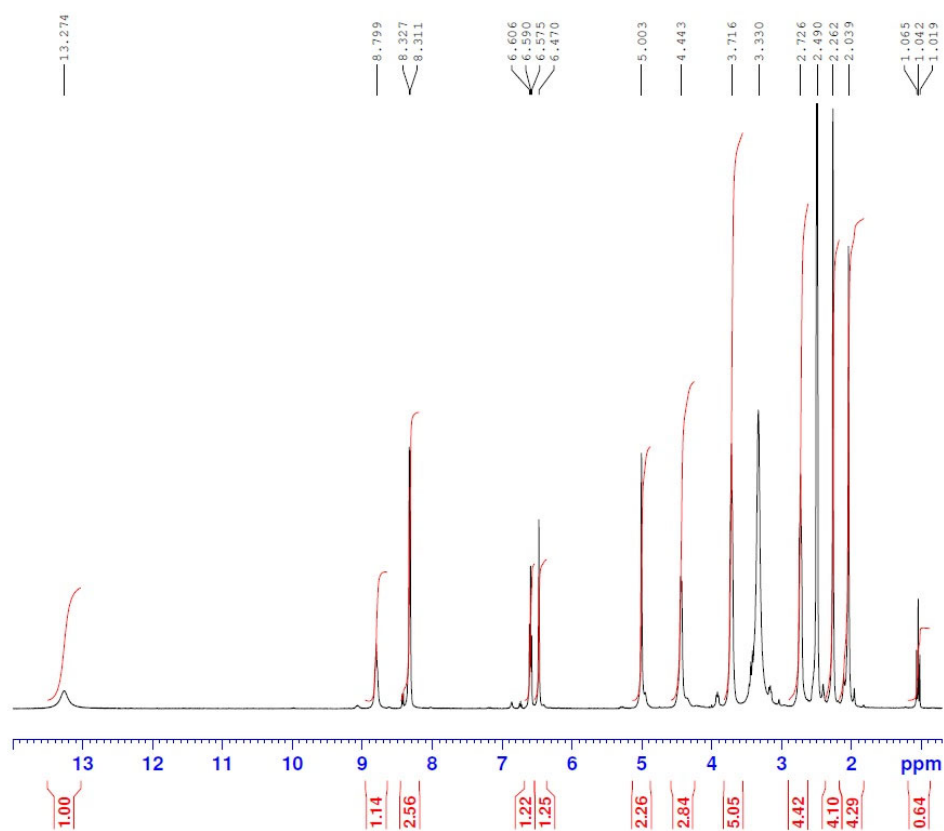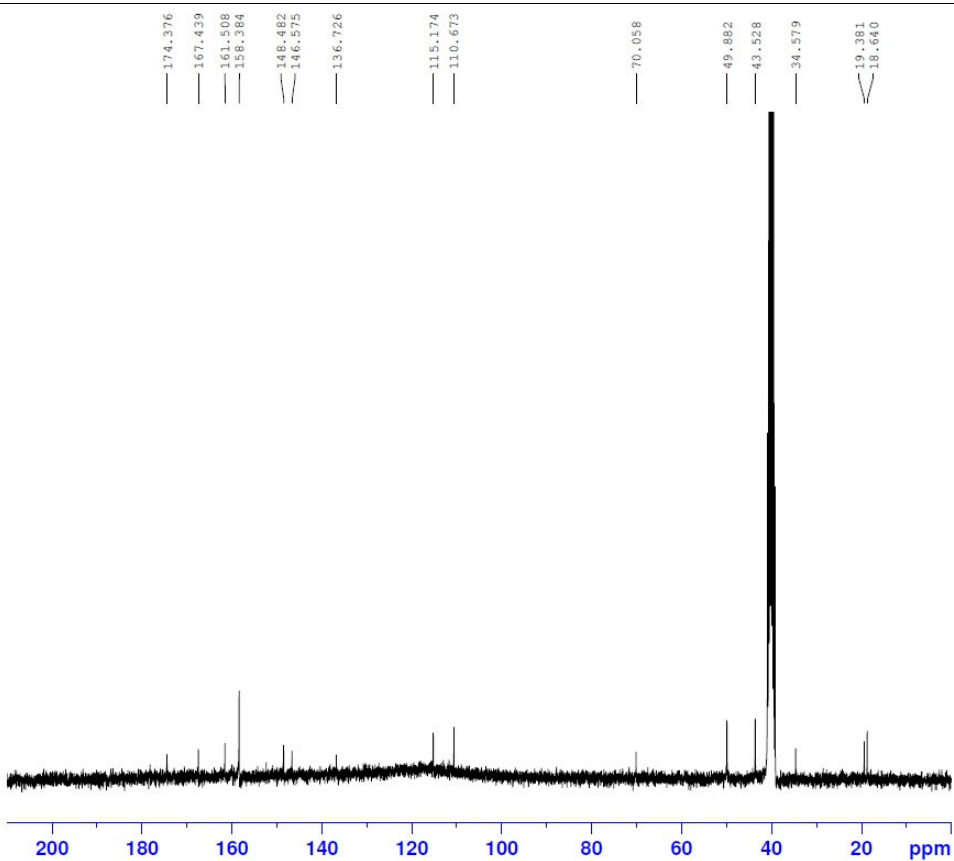

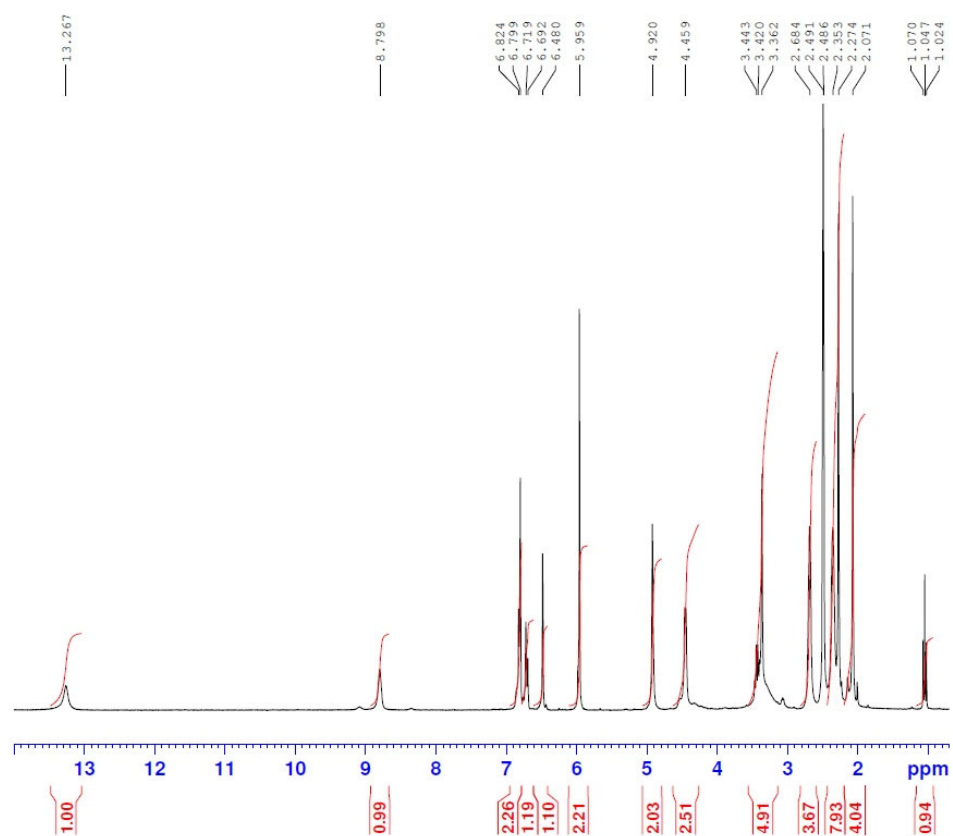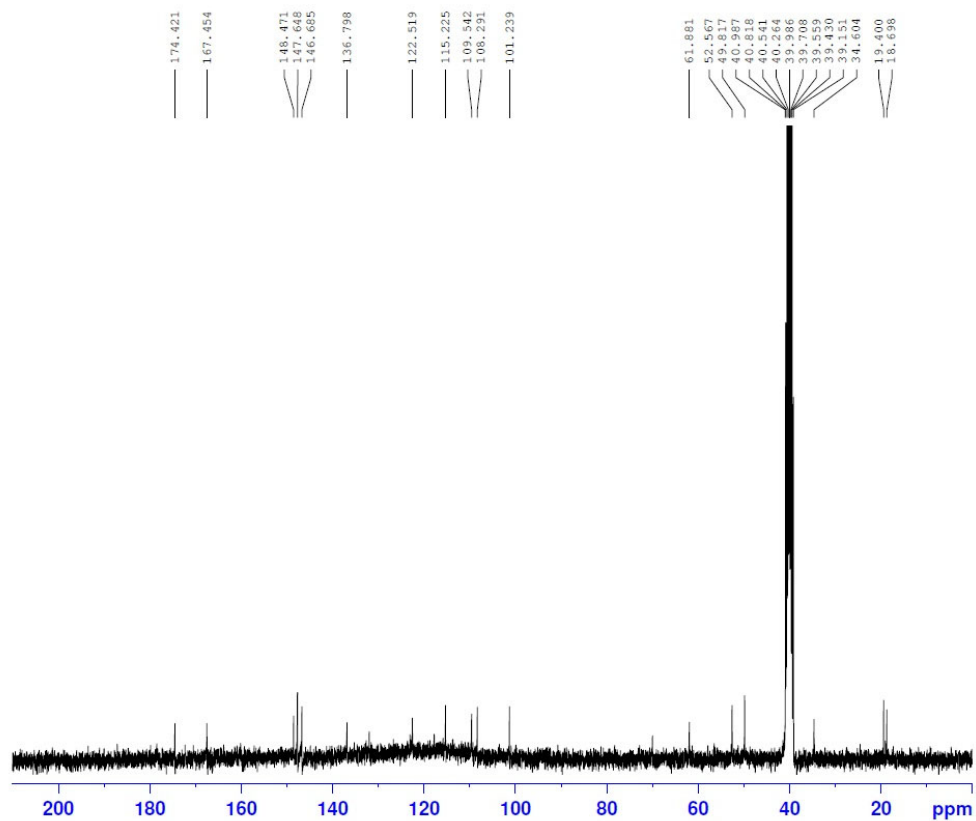

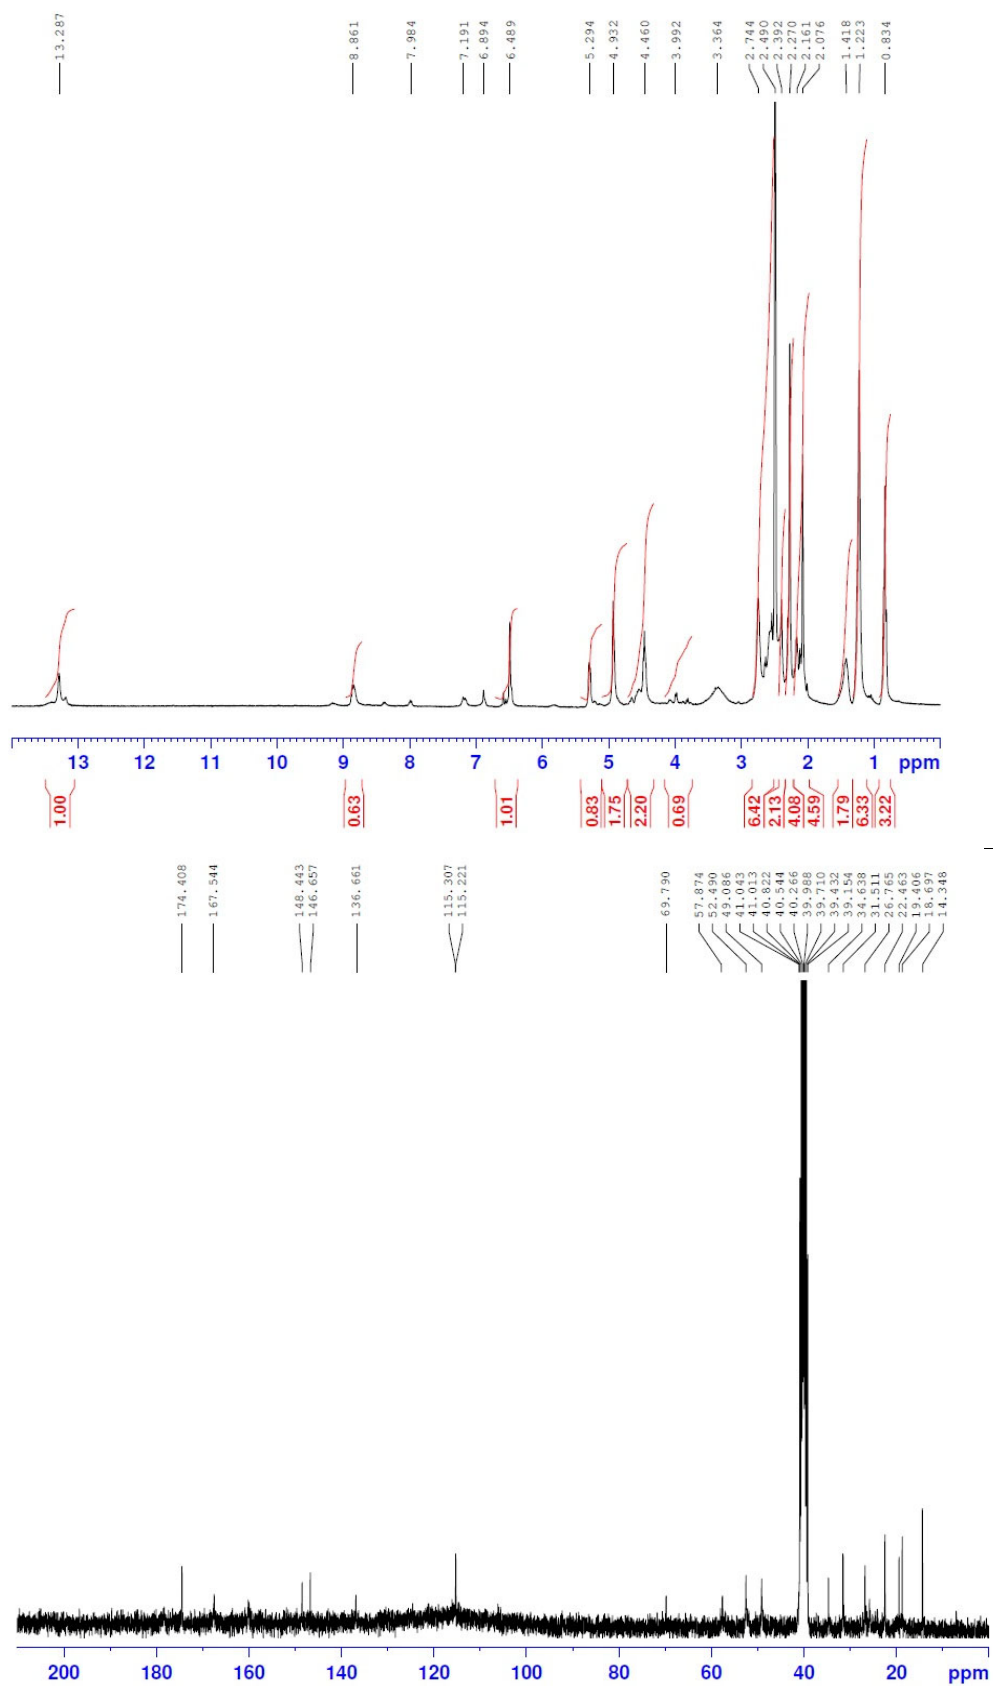

Supplement: s1 [file s1]
